# Supplementary material
Source: publisher site journal article supplement (https://www.spandidos-publications.com/2227/downloadSupplementary)

Figure S1. Transfection efficiency of miR-208a-3p mimics and inhibitor. The expression levels of miR-208a-3p in U2OS, SaOS-2 and MG-63 cells following transfection with miR-208a-3p mimics or inhibitor was detected via reverse transcription-quantitative PCR. \*\*\*P<0.001 vs. NC groups. NC, negative control; miR, microRNA.

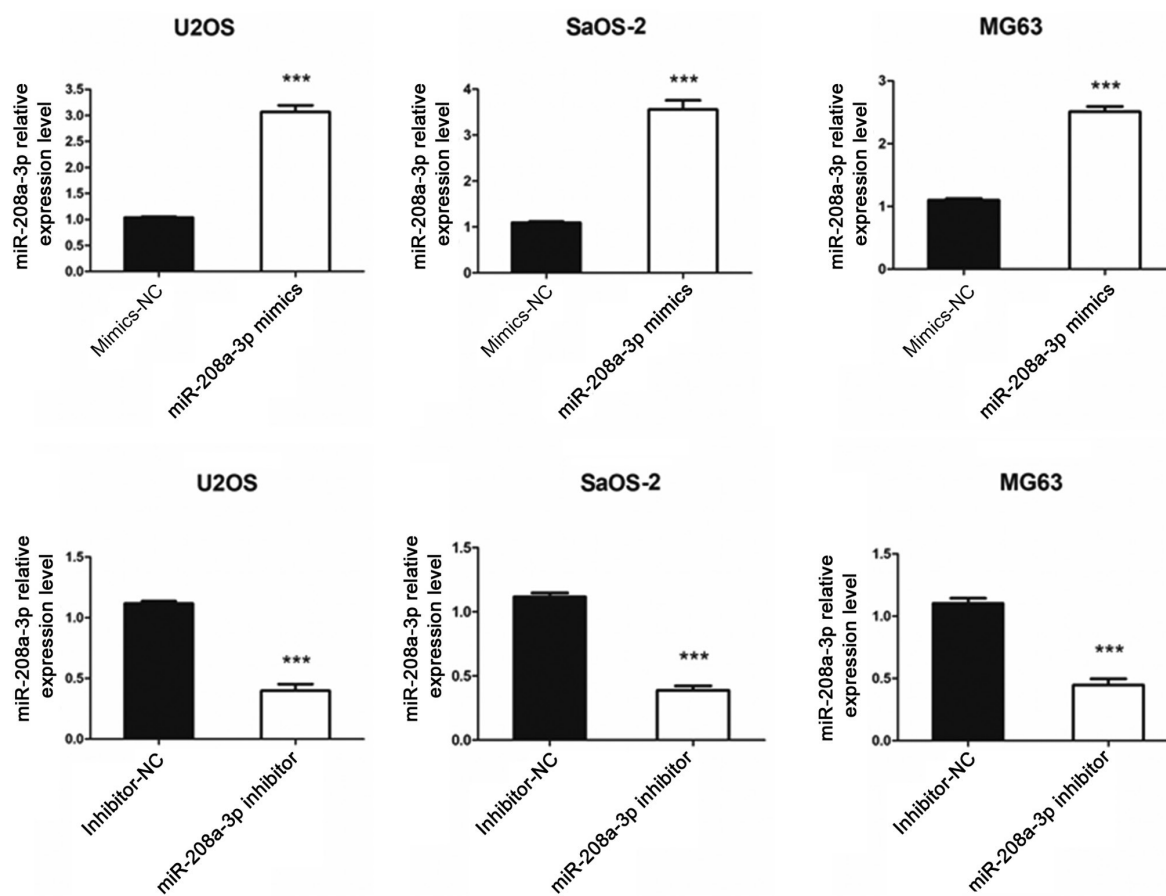

Supplement: Supplementary file 1 [file downloadSupplementary]
